# Supplementary material
Source: Springer Nature journal article supplement (https://www.springermedizin.de/resource/supplementary/12885_2011_2949_MOESM1_ESM.pdf/9462374)
Supplement: MOESM1 [file 9462374]

**Patient fulfils eligibility criteria**

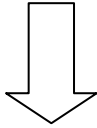

**Randomise**

Stratification: Hospital (CUH or WSH); treatment intent (cure, palliation, supportive care), performance status (ECOG PS 0, 1, or 2), gender and prior cancer drug treatment (yes, or no)

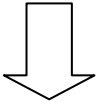

Treatment at  
hospital  
(control arm)

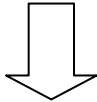

Treatment at  
Outreach  
surgery

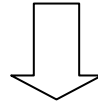

Treatment at  
home

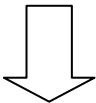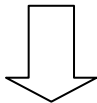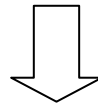

**Assess for patient quality of life measures, health-economics and safety**
